# Supplementary material for: A novel antibacterial gold nanoparticle layer with a self-cleaning ability through the production of oxygen bubbles
Source: Royal Society of Chemistry journal article supplement (doi:10.1039/d2tb00258b), 2022-01-01
Supplement: d2tb00258b1.pdf [file d2tb00258b1.pdf]

## Supporting Information (SI)

### A Novel Antibacterial Gold Nanoparticles Layer with Self-Cleaning Ability by the Production of Bubbles

*Jinwei Liang, Jinghong Wang, Xiang Shen, Benben Lu, Guize Li, Hengxiao Wang, Hongwei Wang\*, and Lin Yuan\*.*

State and Local Joint Engineering Laboratory for Novel Functional Polymeric Materials, College of Chemistry, Chemical Engineering and Materials Science, Soochow University, 199 Ren'ai Road, Suzhou 215123, P. R. China.

\*Corresponding author.

E-mail: wanghw@suda.edu.cn; yuanl@suda.edu.cn

### Cytotoxicity of *p(META1-co-BA)* in solution

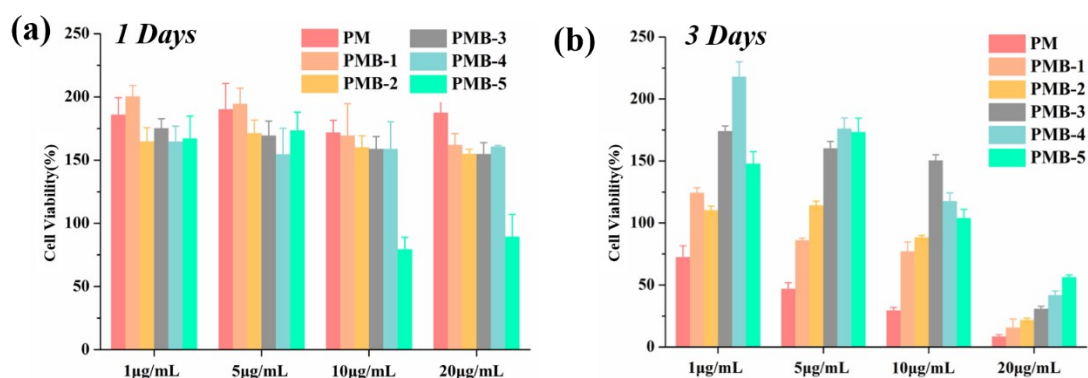

**Fig. S1** (a) and (b) show the cell viability of L929 cells cultured with different concentration gradients for 1 d and 3d.

### Characterization of GNPL with different topological structures

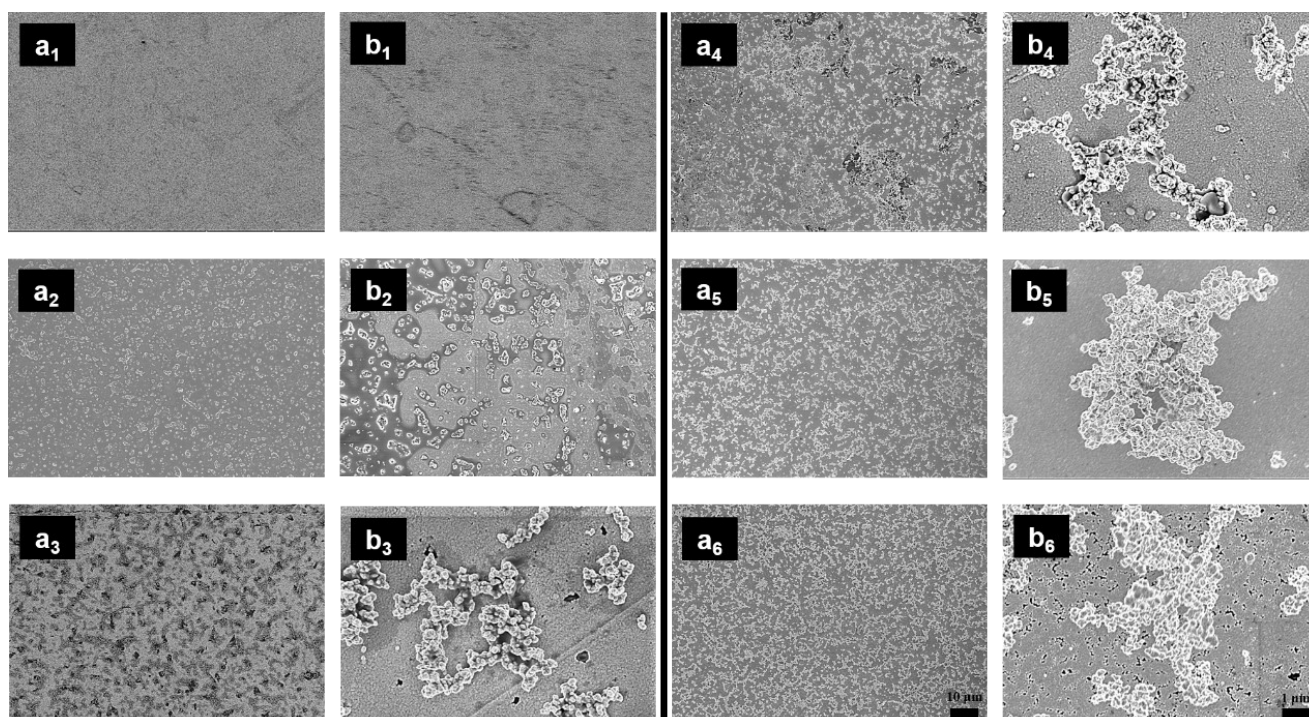

**Fig. S2** The topological morphology of GNPL is characterized by SEM. a1-a6 is the change of topological morphology of GNPL surface from undeposited surface to deposited surface with a scale of 10  $\mu\text{m}$ ; b1-b6 are magnified observations of the local morphology of GNPL in a small field of view, and the substrate is a gold sheet with a scale of 1  $\mu\text{m}$ .

### Modification of *p*(METAI-co-BA)-SH and CAT on the surface of GNPL

**Table S1.** Changes of surface elements of GNPL samples with different topological structures in different modification stages.

| Surface       | Elemental composition (atom%) |      |      |     |
|---------------|-------------------------------|------|------|-----|
|               | C                             | N    | O    | S   |
| GNPL          | 74.0                          | --   | 26.0 | --  |
| GNPL@CAT      | 62.3                          | 16.6 | 21.1 | --  |
| GNPL1@PMB     | 73.3                          | 0.9  | 25.5 | 0.3 |
| GNPL5@PMB     | 74.4                          | 3.7  | 18.0 | 3.9 |
| GNPL1@PMB-CAT | 73.9                          | 1.1  | 24.6 | 0.4 |
| GNPL5@PMB-CAT | 69.4                          | 7.6  | 20.4 | 2.6 |

**Table S2.** Density of polymer PMB-4 alone modified on GNPL surface with different topological structures, density of CAT alone modified and density of conjugated CAT after PMB-4 modified.

| Sample | Density of PMB-4<br>( $\mu\text{g}/\text{cm}^2$ ) | CAT density<br>( $\mu\text{g}/\text{cm}^2$ ) | Conjugated CAT density<br>( $\mu\text{g}/\text{cm}^2$ ). |
|--------|---------------------------------------------------|----------------------------------------------|----------------------------------------------------------|
| GNPL1  | $3.3 \pm 0.3$                                     | $16.3 \pm 1.4$                               | $16.1 \pm 0.9$                                           |
| GNPL2  | $6.5 \pm 0.5$                                     | $25.8 \pm 1.9$                               | $22.3 \pm 1.9$                                           |
| GNPL3  | $8.2 \pm 0.5$                                     | $32.0 \pm 3.3$                               | $25.6 \pm 2.4$                                           |
| GNPL4  | $14.7 \pm 0.9$                                    | $34.8 \pm 3.1$                               | $28.7 \pm 2.8$                                           |
| GNPL5  | $18.0 \pm 1.2$                                    | $38.0 \pm 3.4$                               | $30.9 \pm 3.2$                                           |

### Characterization of the topological morphology of GNPL@PMB-CAT

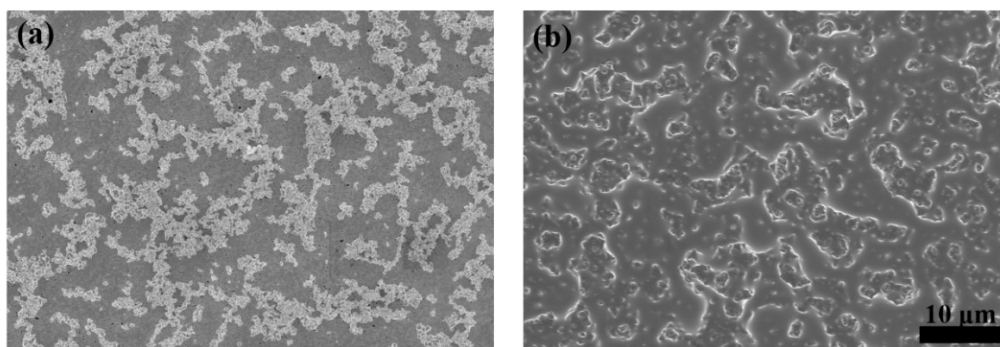

**Fig. S3** The topological morphology of different samples was characterized by SEM, (a) GNPL; (b) GNPL@PMB-CAT, the substrate is gold sheet disc, and the scale is 10 μm.

### Antibacterial activity results of GNPL@PMB-CAT surface

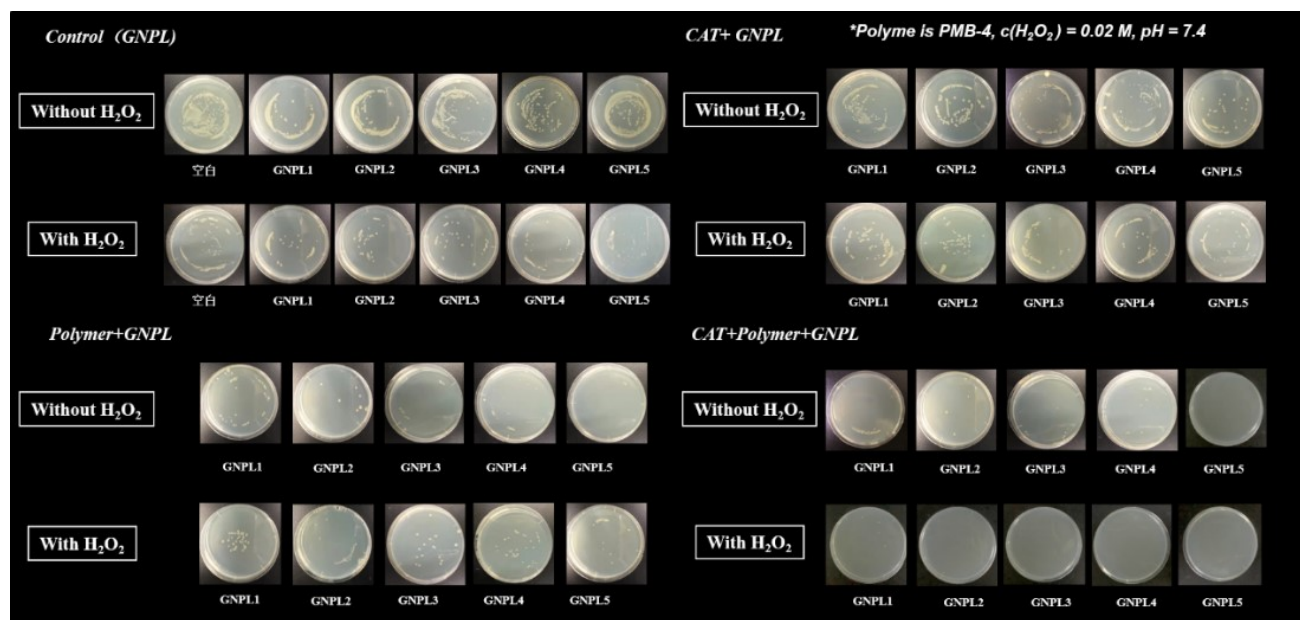

**Fig. S4** The plate coating results of *E. coli* incubation on different sample surfaces under normal conditions of *E. coli* (i.e., without exogenous H<sub>2</sub>O<sub>2</sub>) and simulated exogenous H<sub>2</sub>O<sub>2</sub> environment in vitro (i.e., H<sub>2</sub>O<sub>2</sub> added).

***Antibacterial activity results and bacterial adhesion density of GNPL@PMB-CAT surface***

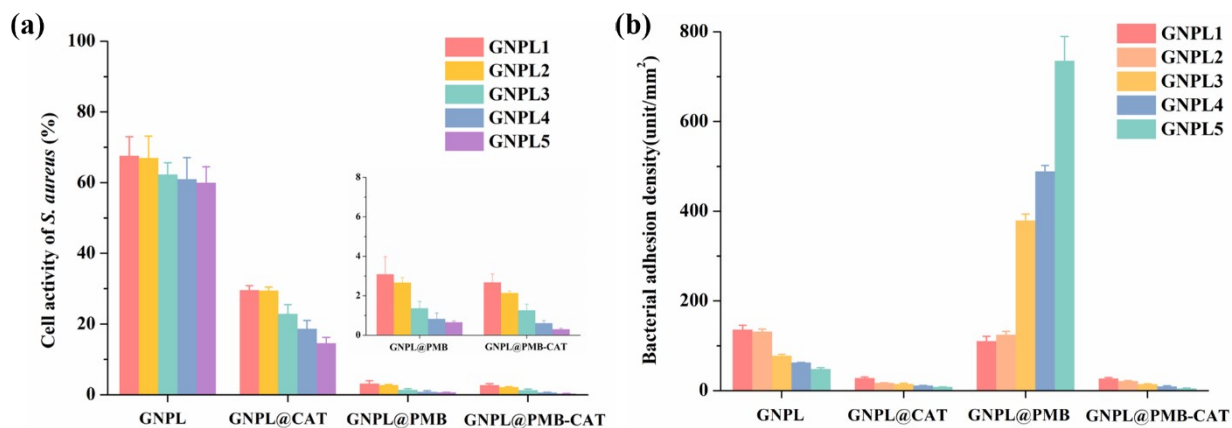

**Fig. S5** (a) The activity of *S. aureus* on different sample surfaces under conventional conditions; (b) The adhesion density of *S. aureus* on different sample surfaces under conventional conditions, mean  $\pm$  SD (n = 3).

***Bacterial adhesion on the surface of materials***



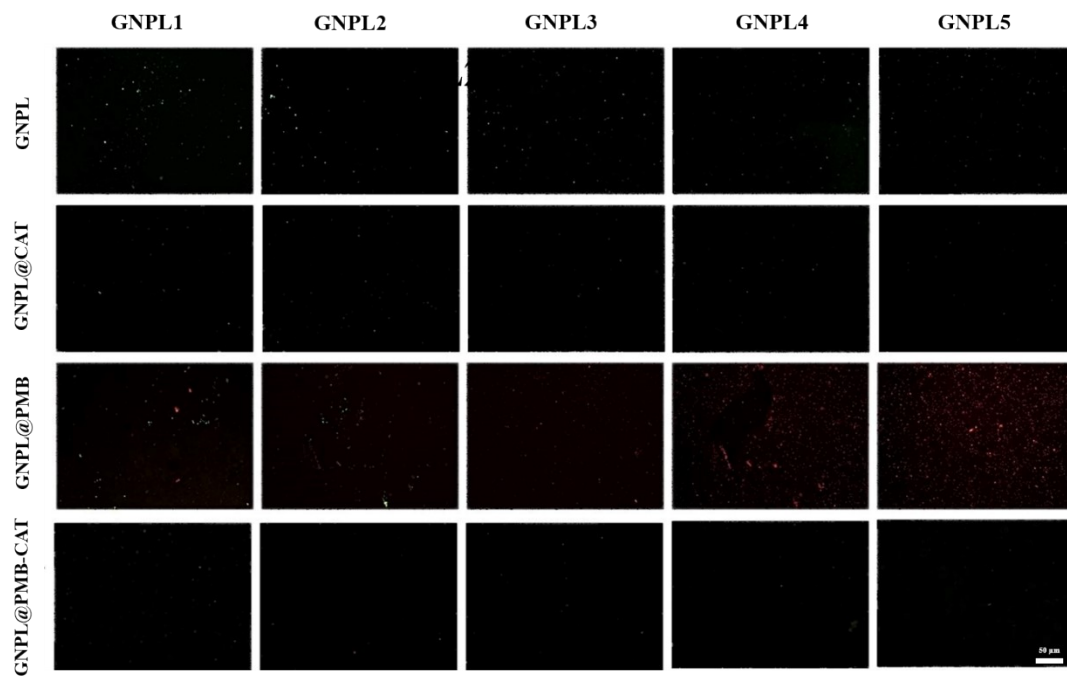

**Fig. S6.** *E. coli* adhesion on the surface of samples with different topological shapes.

***Decomposition of endogenous  $H_2O_2$  in bacteria on the surface of GNPL@PMB-CAT***

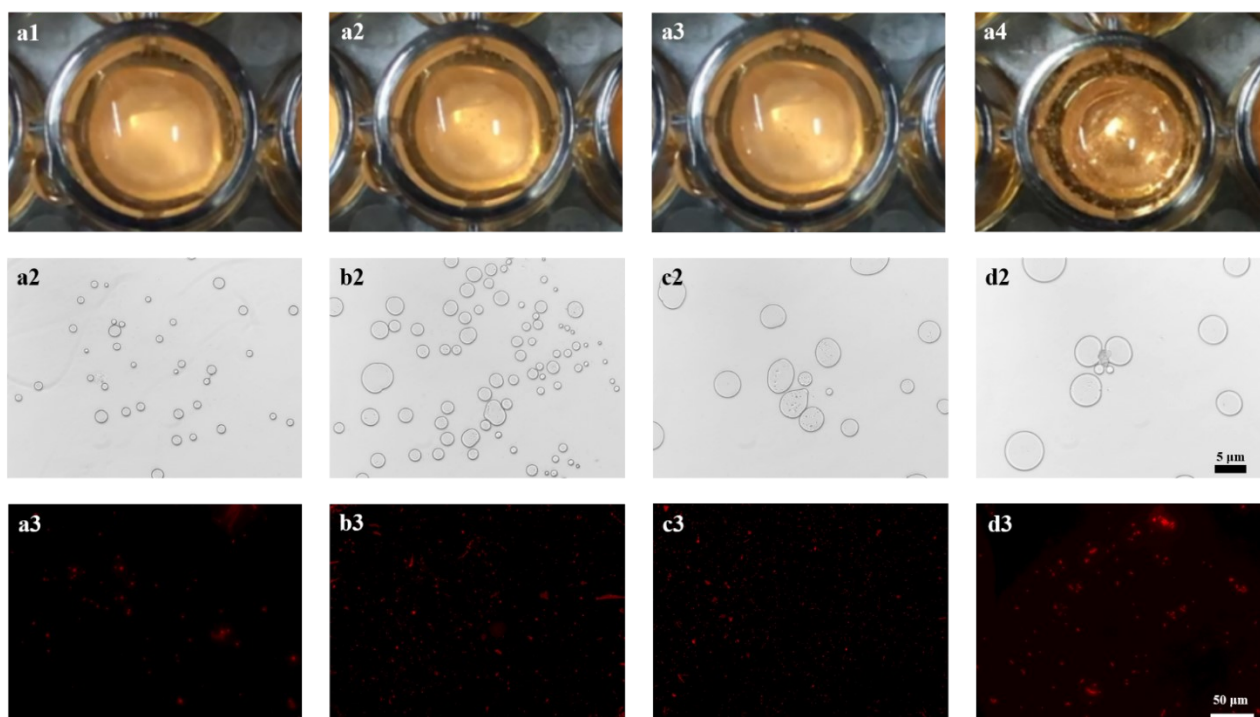

**Fig. S7** After incubating the surfaces of different samples with bacteria for a period of time, (1) the suspension on GNPL@PMB-CAT began to produce bubbles' (2) Bubbles and bacteria were observed under bright-field microscope; (3) Dead bacteria were observed in the corresponding bacterial suspension. (a-30 min; b-1 h; c-2 h; d-3 h)

*Dissolved oxygen test*

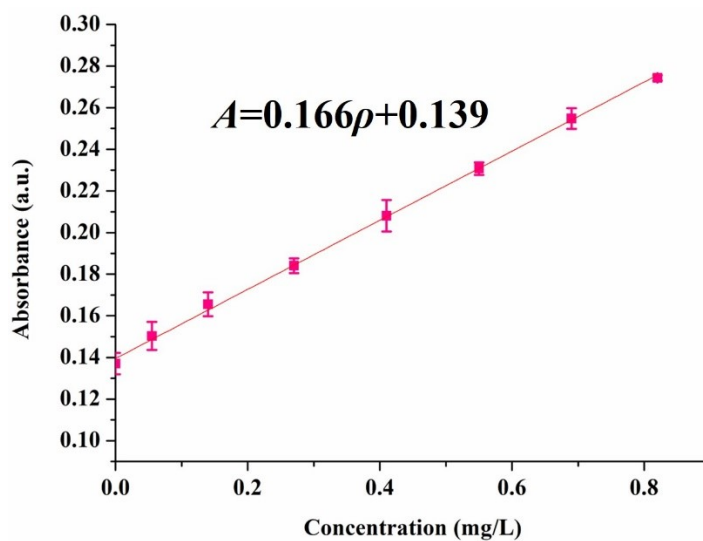

**Fig. S8** The standard curve for the dissolved oxygen.

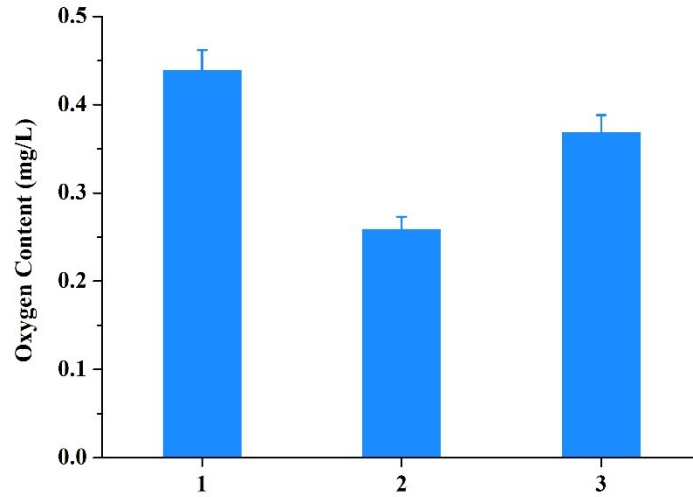

**Fig. S9** Oxygen content released from the sample and dissolved in the solution.

**Antibacterial mechanism of GNPL@PMB-CAT surface**

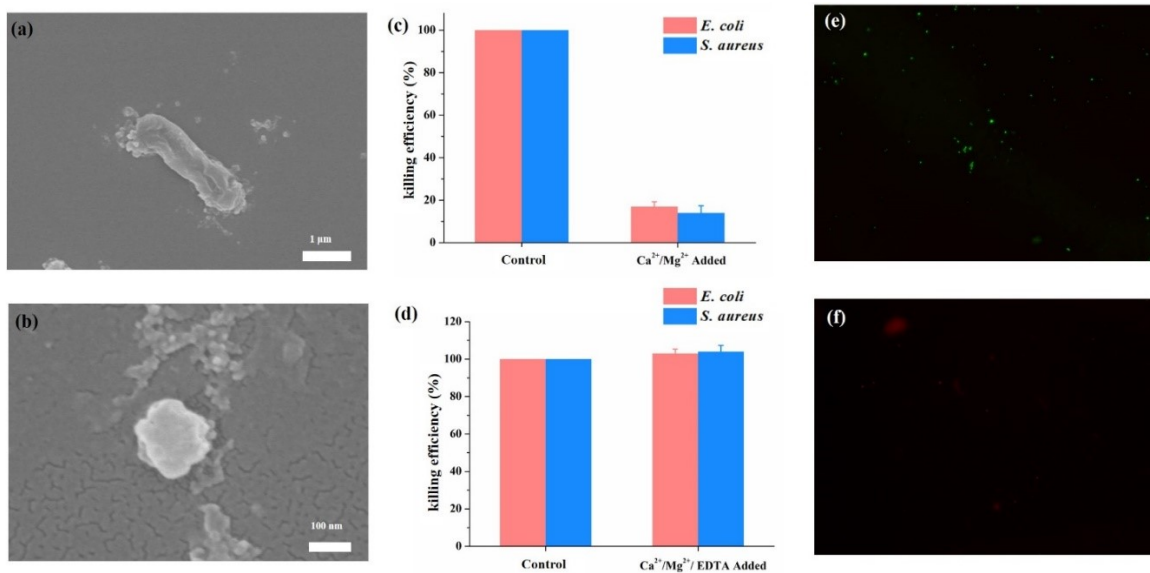

**Fig. S10** (a), (b) show the death state of the bacteria characterized by SEM. (c) shows the bacterial killing efficiency when adding Ca<sup>2+</sup> ions (20 mM) and Mg<sup>2+</sup> (35 mM) ions to inhibit PMB. (d) shows the bacterial killing efficiency when adding EDTA (20 mM) to chelate the Ca<sup>2+</sup> and Mg<sup>2+</sup> ions.



(e) and (f) show the typical adhesion state of *E. coli* on the surface of GNPL5@PMB-CAT.

***Self-cleaning of GNPL@PMB-CAT surface assisted by exogenous reactive oxygen species***

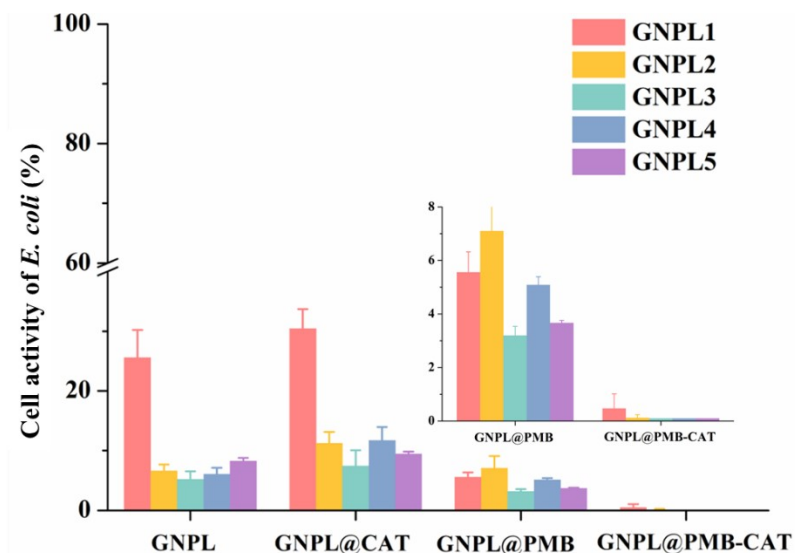

**Fig. S11** Simulating the activity of *E. coli* on the surface of different samples in vitro in the presence of exogenous  $H_2O_2$  (i.e. adding  $H_2O_2$ ).
